# Supplementary material
Source: PubMed Central journal article supplement (PMC6643567)
Supplement: ao7b00416_si_001.pdf [file ao7b00416_si_001.pdf]

## **Preferential Mitochondrial Localization of a Goniotalamin Fluorescent Derivative**

Ismael Raitz,<sup>†</sup> Roberto Y. de Souza Filho,<sup>§</sup> Lorena P. de Andrade,<sup>§</sup> Jose R. Correa,<sup>\*,||</sup>  
Brenno A. D. Neto,<sup>\*,§</sup> and Ronaldo A. Pilli<sup>\*,†,‡</sup>

<sup>†</sup>Institute of Chemistry, University of Campinas, Cidade Universitária Zeferino Vaz, 13083-970  
Campinas, SP, Brazil. Email: pilli@iqm.unicamp.br

<sup>‡</sup>Obesity and Comorbidities Research Center, University of Campinas, Cidade Universitária Zeferino  
Vaz, 13083-862 Campinas, SP, Brazil

<sup>§</sup>Laboratory of Medicinal and Technological Chemistry, Institute of Chemistry, University of Brasília,  
Campus Universitário Darcy Ribeiro, 70904-970 Brasília, DF, Brazil. Email: brenno.ipi@gmail.com

<sup>||</sup>Laboratory of Microscopy and Microanalysis, Institute of Biological Sciences, University of Brasília,  
Campus Universitário Darcy Ribeiro, 70910-900 Brasília, DF, Brazil. E-mail: correa@unb.br

## Summary

|             |             |
|-------------|-------------|
| Page S3     | Figure S1   |
| Page S4     | Figure S2   |
| Page S5     | Figure S3   |
| Page S6     | Figure S4   |
| Page S7     | Figure S5   |
| Page S8     | Figure S6   |
| Page S9     | Figure S7   |
| Page S10    | Figure S8   |
| Page S11    | Figure S9   |
| Page S12    | Figure S10  |
| Page S13-19 | NMR Spectra |

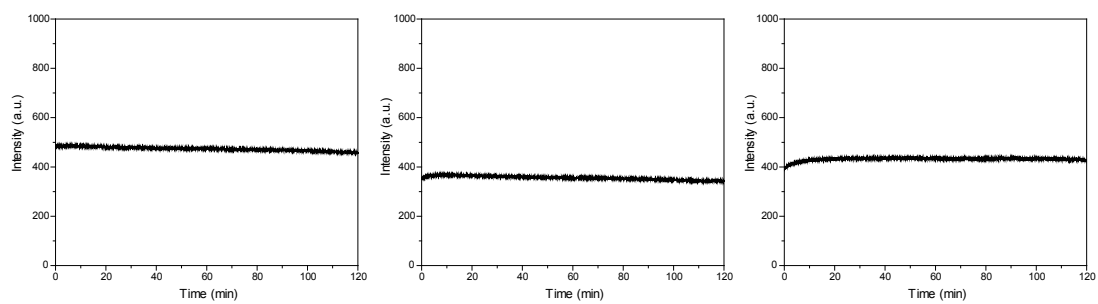

**Figure S1.** Photostability of BTD-GTN (**1**) acquired at room temperature upon excitation at 405, 366 and 254 nm (respectively) while monitoring the emission at 558 nm. Time-dependence of photoluminescence intensity was carried out with a Xe lamp (400 W).

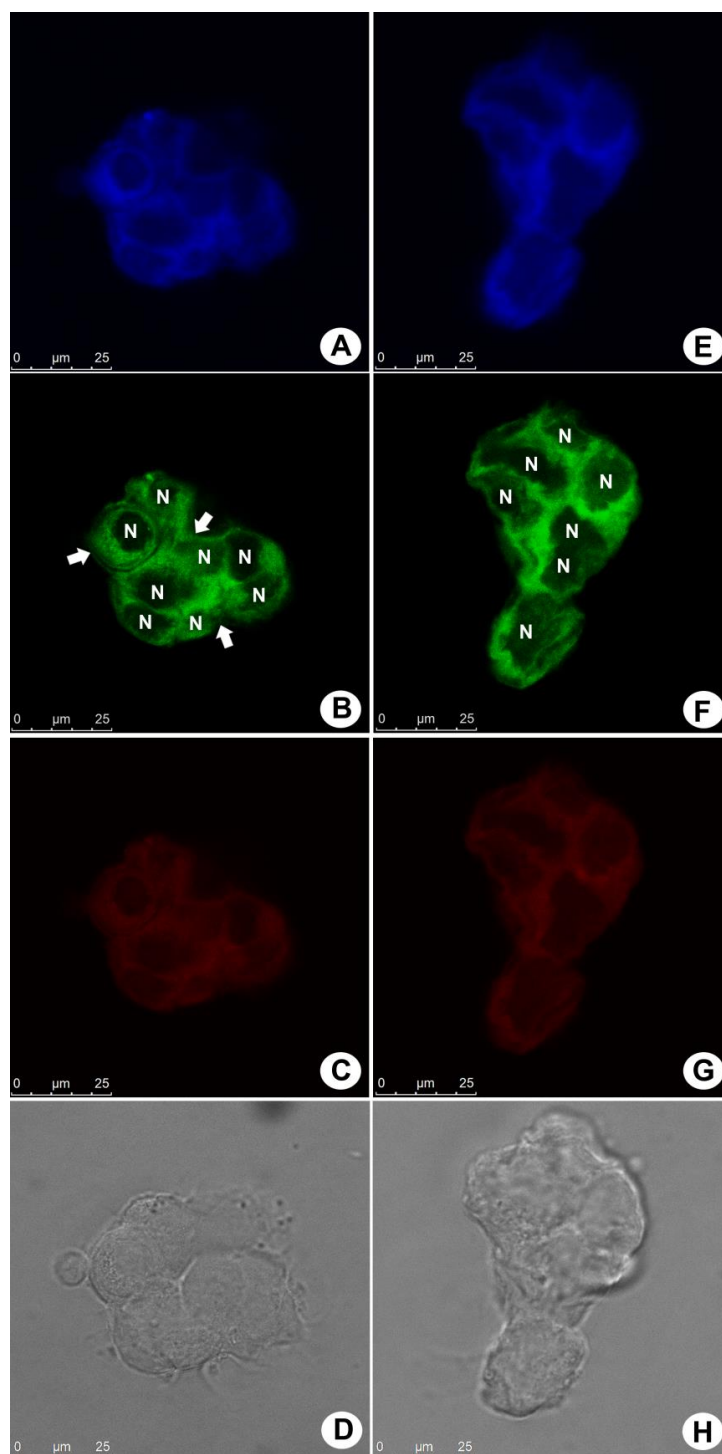

**Figure S2.** Fluorescent profile of A549 (human lung carcinoma) cells treated with BTD-GTN (**1**) visualised at the blue, green and red channels. Images (A), (B), (C) and (D) show live cells whereas (E), (F), (G) and (H) show fixed cells. (D) and (H) show the morphological aspects of the samples by phase contrast microscopy. Arrows show the cytoplasm distribution of BTD-GTN (**1**) and the nuclei are showed as black voids identified by "N" letters. Reference scale bar 25  $\mu\text{m}$ .

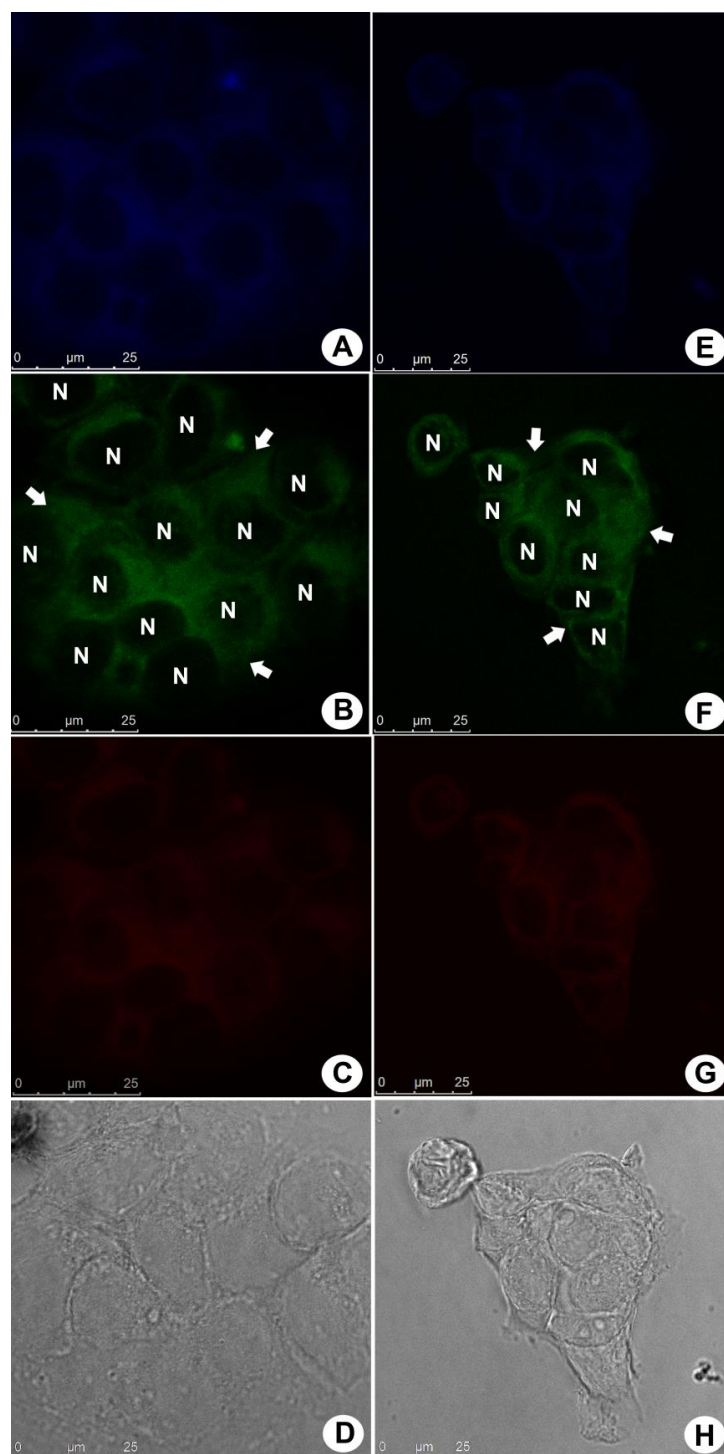

**Figure S3.** Fluorescent profile of MCF-7 (breast cancer cell line) cells treated with BTD-GTN (**1**) visualised at the blue, green and red channels. Images (A), (B), (C) and (D) show live cells whereas (E), (F), (G) and (H) show fixed cells. (D) and (H) show the morphological aspects of the samples by phase contrast microscopy. Arrows show the cytoplasm distribution of BTD-GTN (**1**) and the nuclei are showed as black voids identified by "N" letters. Reference scale bar 25  $\mu\text{m}$ .

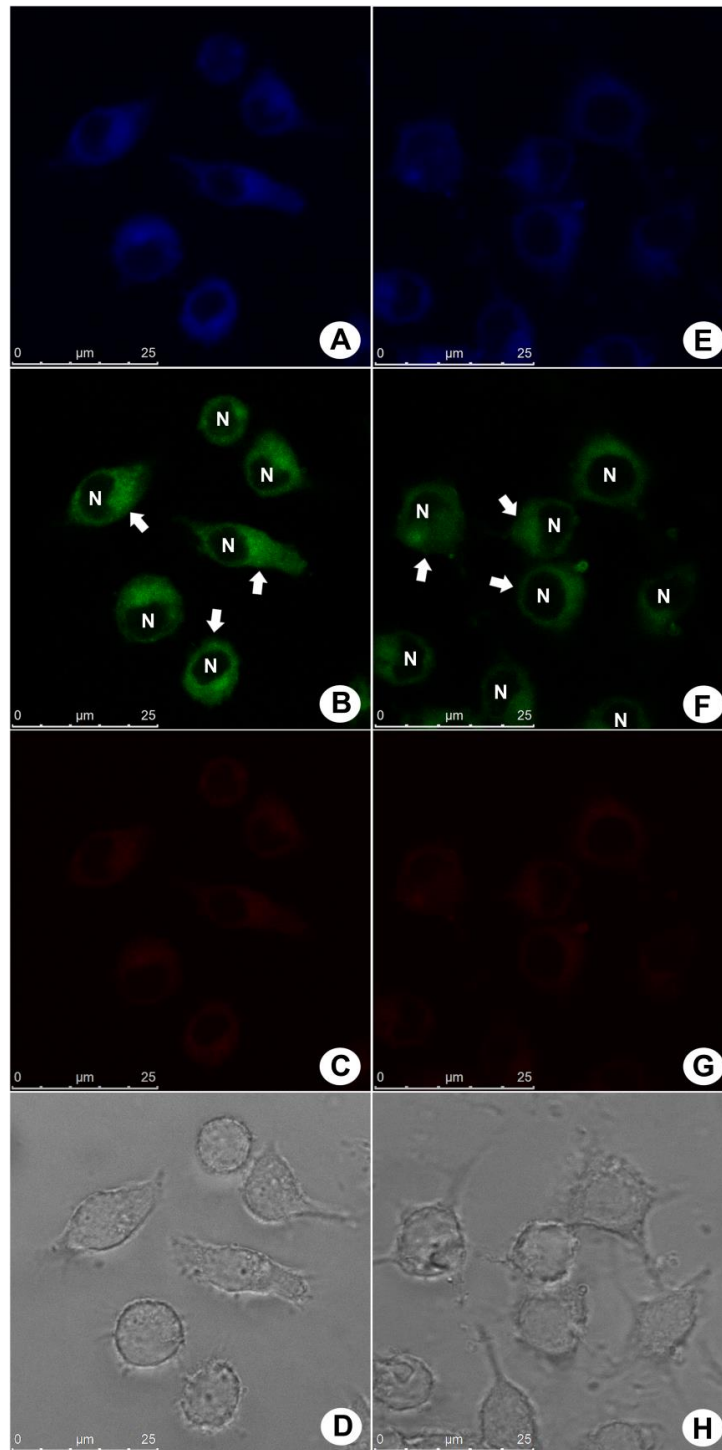

**Figure S4.** Fluorescent profile of RAW 264.7 (murine macrophage cell line) cells treated with BTD-GTN (**1**) visualised at the blue, green and red channels. Images (A), (B), (C) and (D) show live cells whereas (E), (F), (G) and (H) show fixed cells. (D) and (H) show the morphological aspects of the samples by phase contrast microscopy. Arrows show the cytoplasm distribution of BTD-GTN (**1**) and the nuclei are shown as black voids identified by “N” letters. Reference scale bar = 25  $\mu\text{m}$ .

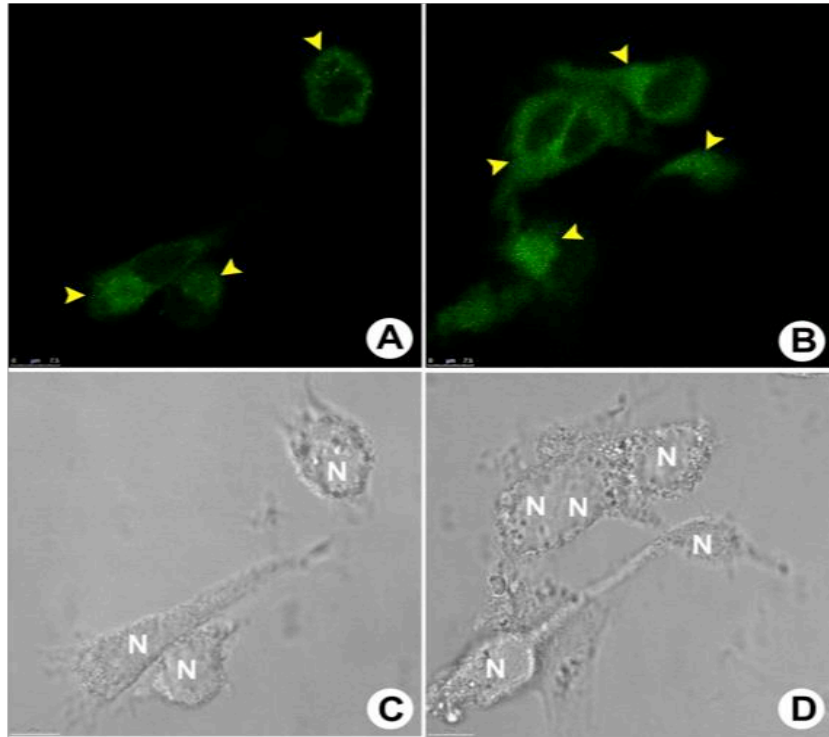

**Figure S5.** BTD-GTN (1) and Rhodamine 1,2,3 staining profile. The images A and B show the cytoplasmic distribution of fluorescence signal. The yellow arrowheads indicate the perinuclear accumulation for both markers. Images C and D show the normal morphological aspects of the cell samples by phase contrast microscopy. The nuclei are indicating by "N" letters. Reference scale bar = 7.5  $\mu\text{m}$ .

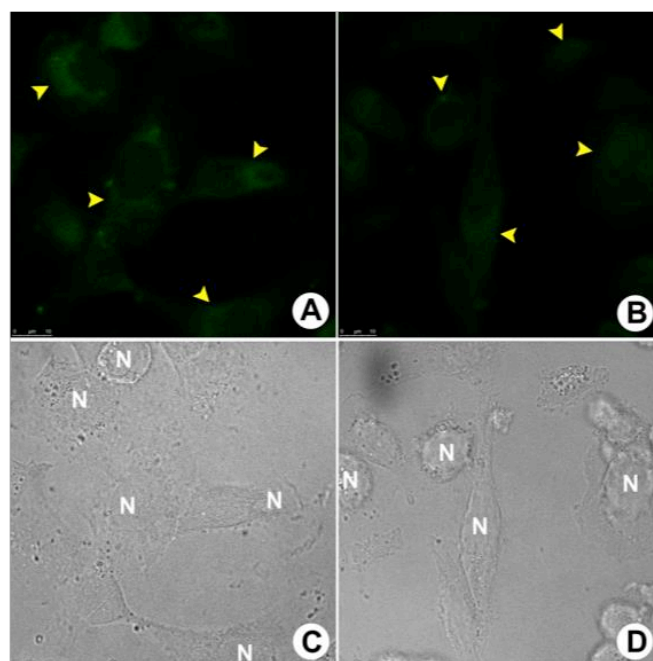

**Figure S6.** Fluorescence dislodge assay (GTN x BTD-GTN). Image A shows the intensity of fluorescence emission from control sample incubated only with BTD-GTN (**1**). Image B shows the intensity of fluorescence emission from sample pre-incubated with GTN solution at 2.5  $\mu\text{M}$ , followed by incubation with BTD-GTN (**1**) solution 10  $\mu\text{M}$ . Images C and D show the normal morphological aspects of the cell samples by phase contrast microscopy. The cell nuclei are indicated by "N" letters. Reference scale bar = 10  $\mu\text{m}$ .



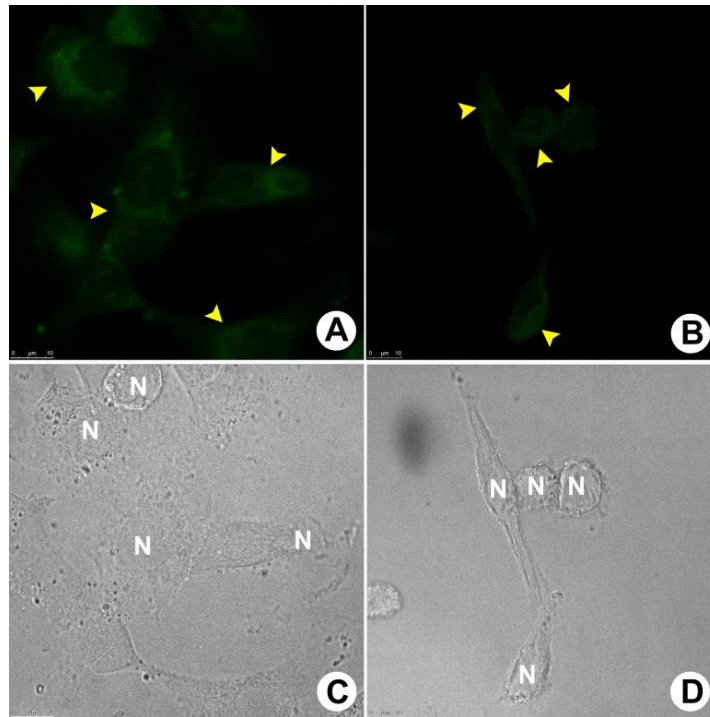

**Figure S7.** Fluorescence dislodge assay (GTN x BTD-GTN). Image A shows the intensity of fluorescence emission from control sample incubated only with BTD-GTN (**1**). Image B shows the intensity of fluorescence emission from sample pre-incubated with GTN solution at 5  $\mu\text{M}$ , followed by incubation with BTD-GTN (**1**) solution 10  $\mu\text{M}$ . Images C and D show the normal morphological aspects of the cell samples by phase contrast microscopy. The cell nuclei are indicated by "N" letters. Reference scale bar = 10  $\mu\text{m}$ .

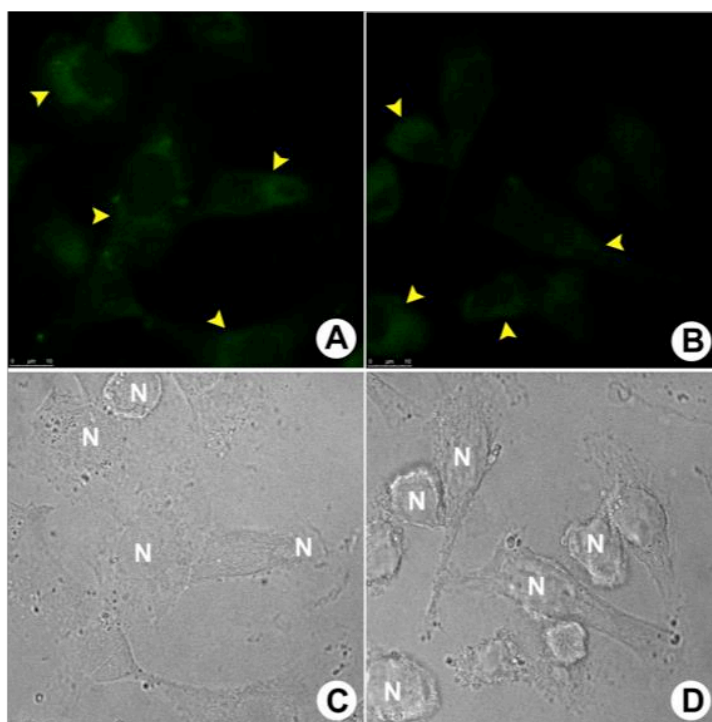

**Figure S8.** Fluorescence dislodge assay (GTN x BTD-GTN). Image A shows the intensity of fluorescence emission from control sample incubated only with BTD-GTN (**1**). Image B shows the intensity of fluorescence emission from sample pre-incubated with GTN solution at 7.5  $\mu\text{M}$ , followed by incubation with BTD-GTN (**1**) 10  $\mu\text{M}$  solution. Images C and D show the normal morphological aspects of the cell samples by phase contrast microscopy. The cell nuclei are indicated by "N" letters. Reference scale bar = 10  $\mu\text{m}$ .

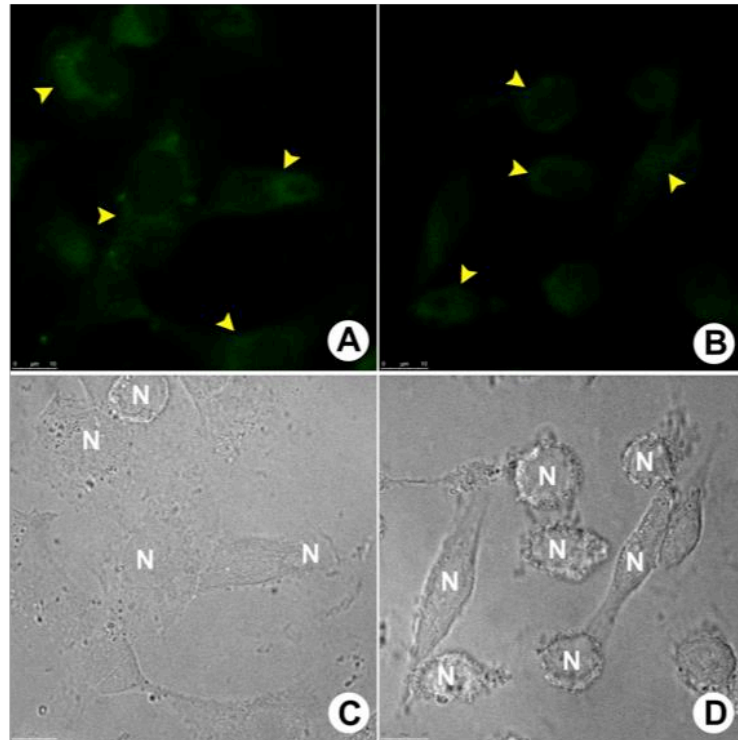

**Figure S9.** Fluorescence dislodge assay (GTN x BTD-GTN). The images A shows the intensity of fluorescence emission from control sample incubated only with BTD-GTN. The image B shows the intensity of fluorescence emission from sample pre-incubated with GTN solution at 10  $\mu$ M follow incubation with BTD-GTN solution 10  $\mu$ M. Images C and D show the normal morphological aspects of the cell samples by phase contrast microscopy. The cells nuclei are indicating by "N" letters. Reference scale bar = 10  $\mu$ m.

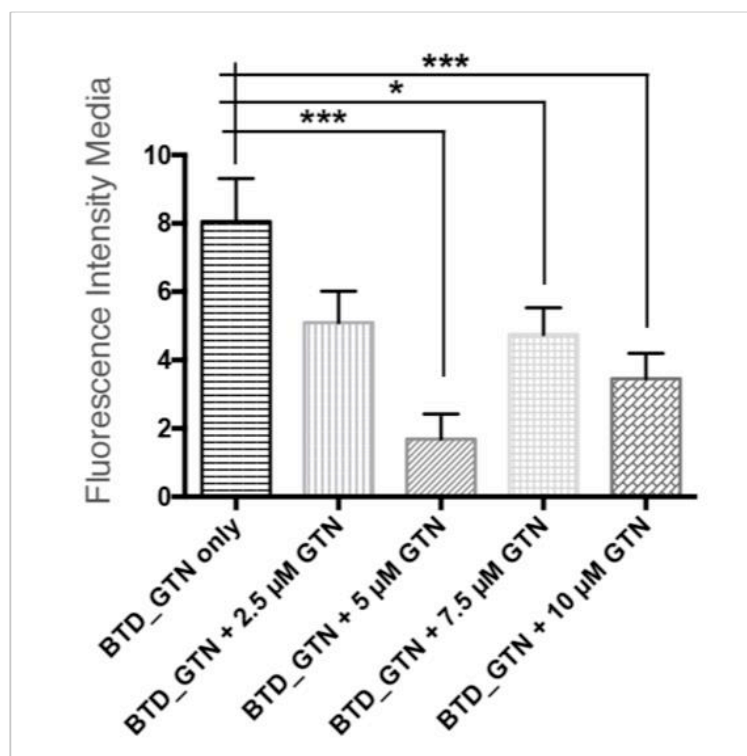

**Figure S10.** Quantitative analyses of fluorescence emission intensities from fluorescence dislodgee assay (GTN x BTD-GTN). The sample pre-incubated with GTN solution produces reduction of fluorescence emission intensities. Only the fluorescence emission reduction obtained from sample pre-incubated with GTN solution at 2.5  $\mu\text{M}$  showed no statistic significance. \* =  $p \leq 0.05$  - \*\*\* =  $p \leq 0.001$

|                       |           |                   |                |                        |              |                |       |
|-----------------------|-----------|-------------------|----------------|------------------------|--------------|----------------|-------|
| Frequency (MHz)       | 250.13    | Nucleus           | <sup>1</sup> H | Number of Transients   | 16           | Origin         | spect |
| Original Points Count | 16384     | Owner             | root           | Points Count           | 32768        | Pulse Sequence | zg30  |
| Receiver Gain         | 512.00    | SW(cyclical) (Hz) | 5175.98        | Solvent                | CHLOROFORM-d |                |       |
| Spectrum Offset (Hz)  | 1750.9110 | Sweep Width (Hz)  | 5175.83        | Temperature (degree C) | 25.160       |                |       |

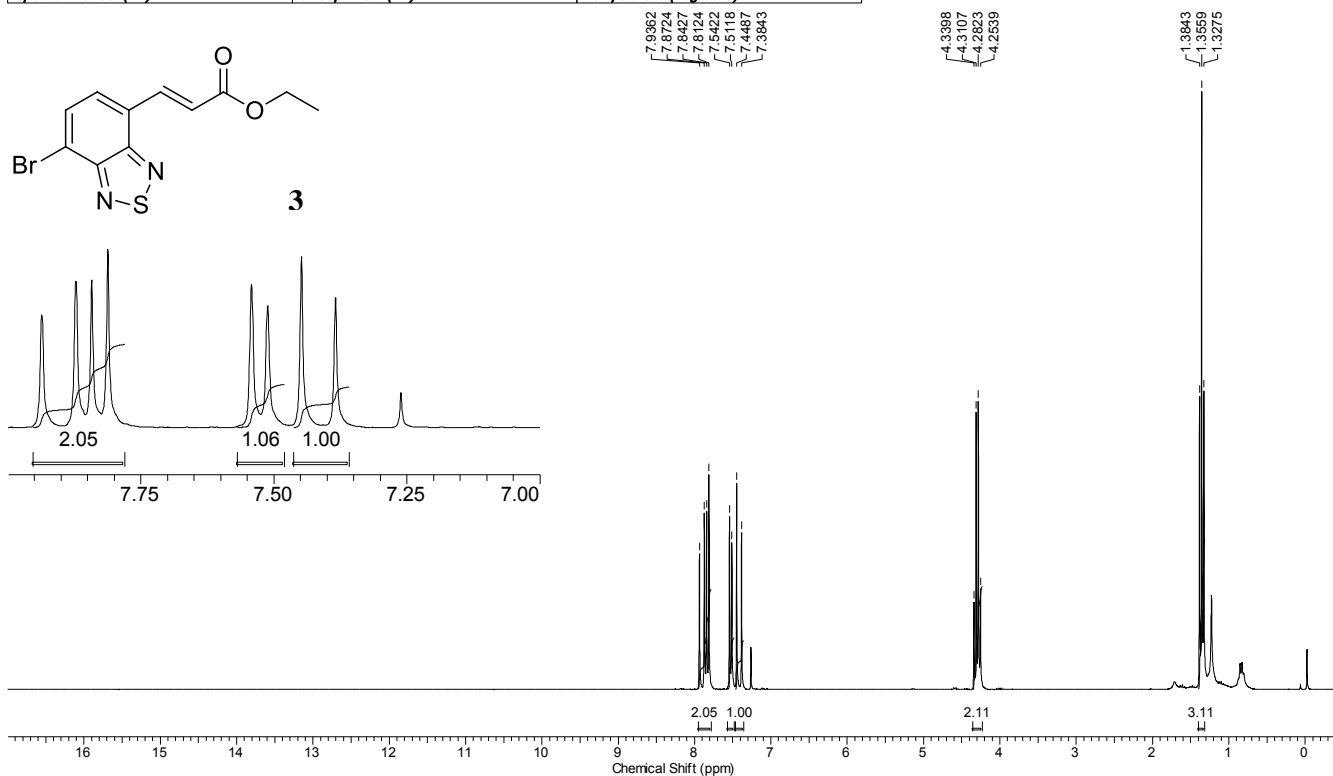

Figure S11: <sup>1</sup>H NMR spectrum (250 MHz, CDCl<sub>3</sub>) for compound 3.

|                       |           |                   |                 |                        |              |                |        |
|-----------------------|-----------|-------------------|-----------------|------------------------|--------------|----------------|--------|
| Frequency (MHz)       | 62.90     | Nucleus           | <sup>13</sup> C | Number of Transients   | 1024         | Origin         | spect  |
| Original Points Count | 8192      | Owner             | root            | Points Count           | 32768        | Pulse Sequence | zgpg30 |
| Receiver Gain         | 645.10    | SW(cyclical) (Hz) | 15060.24        | Solvent                | CHLOROFORM-d |                |        |
| Spectrum Offset (Hz)  | 6289.0518 | Sweep Width (Hz)  | 15059.78        | Temperature (degree C) | 25.160       |                |        |

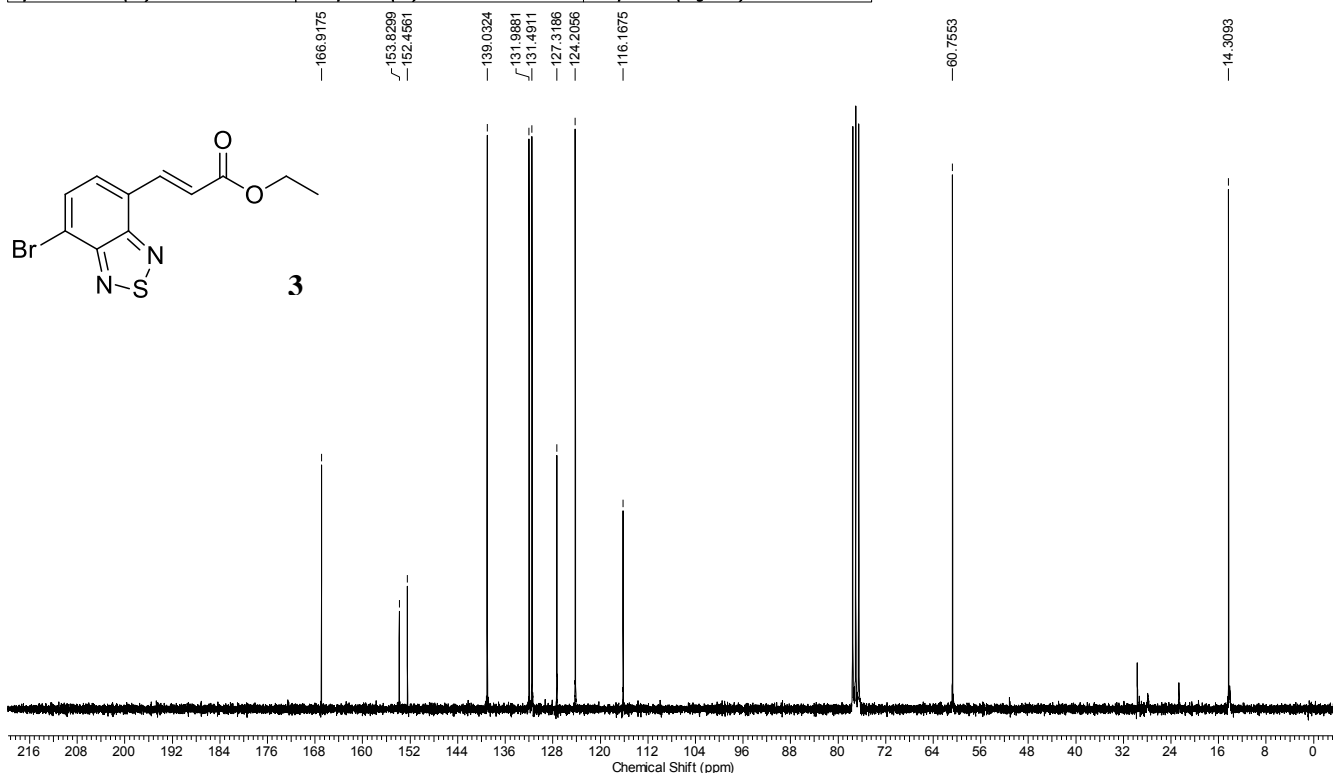

Figure S12: <sup>13</sup>C NMR spectrum (62,5 MHz, CDCl<sub>3</sub>) for compound 3.

|                       |           |                   |                |                        |              |                |       |
|-----------------------|-----------|-------------------|----------------|------------------------|--------------|----------------|-------|
| Frequency (MHz)       | 250.13    | Nucleus           | <sup>1</sup> H | Number of Transients   | 16           | Origin         | spect |
| Original Points Count | 16384     | Owner             | root           | Points Count           | 32768        | Pulse Sequence | zg30  |
| Receiver Gain         | 645.10    | SW(cyclical) (Hz) | 5175.98        | Solvent                | CHLOROFORM-d |                |       |
| Spectrum Offset (Hz)  | 1750.4702 | Sweep Width (Hz)  | 5175.83        | Temperature (degree C) | 25.160       |                |       |

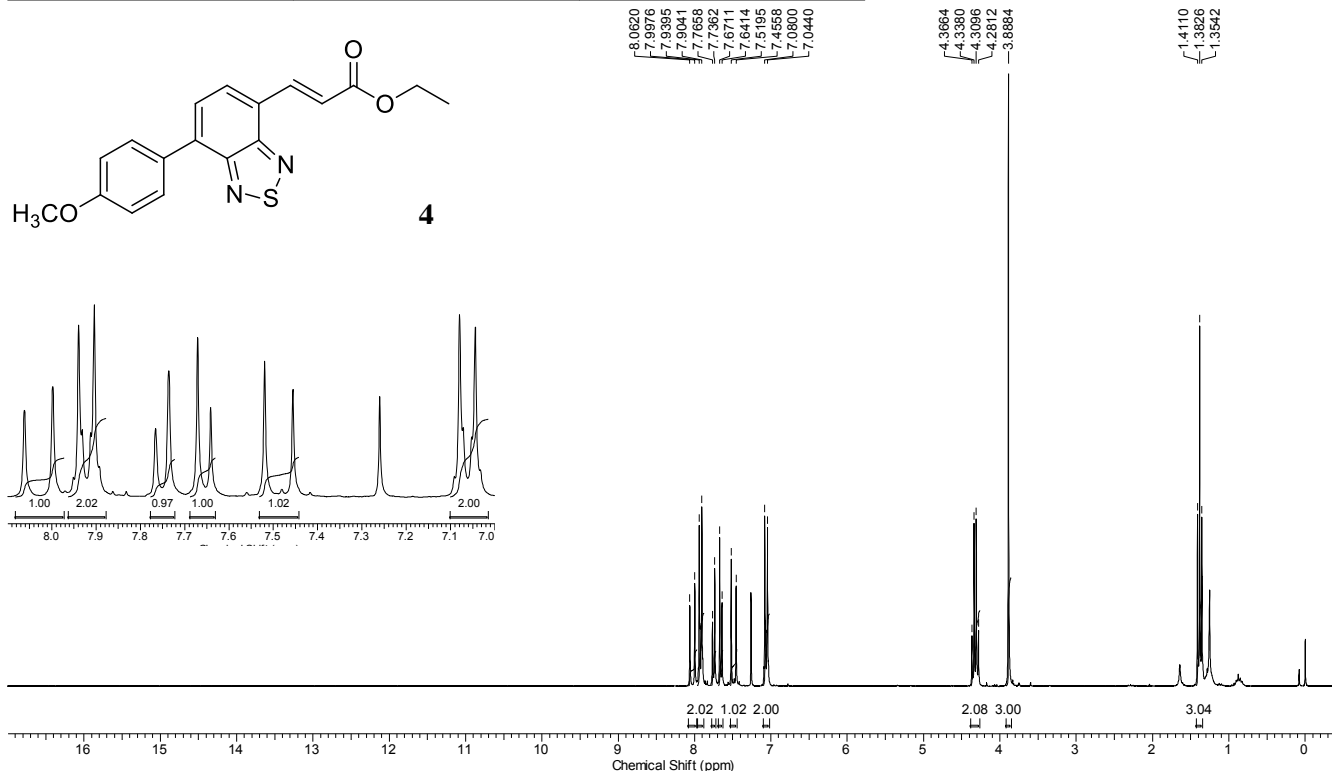

Figure S13: <sup>1</sup>H NMR spectrum (250 MHz, CDCl<sub>3</sub>) for compound 4.

|                       |          |                        |                 |                      |              |                      |           |
|-----------------------|----------|------------------------|-----------------|----------------------|--------------|----------------------|-----------|
| Frequency (MHz)       | 62.90    | Nucleus                | <sup>13</sup> C | Number of Transients | 803          | Origin               | spect     |
| Original Points Count | 8192     | Owner                  | root            | Points Count         | 32768        | Pulse Sequence       | zgpg30    |
| Receiver Gain         | 724.10   | SW(cyclical) (Hz)      | 15060.24        | Solvent              | CHLOROFORM-d | Spectrum Offset (Hz) | 6287.6929 |
| Sweep Width (Hz)      | 15059.78 | Temperature (degree C) | 25.160          |                      |              |                      |           |

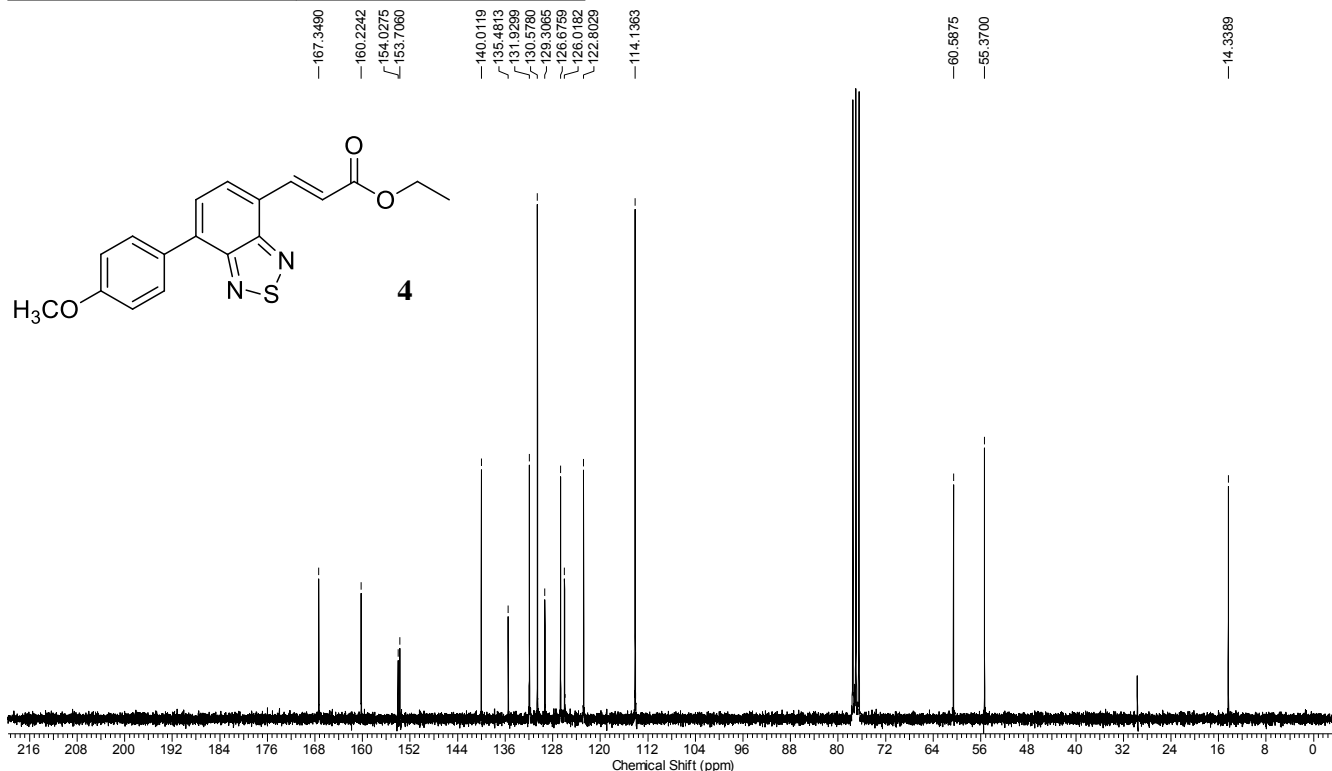

Figure S14: <sup>13</sup>C NMR spectrum (62,5 MHz, CDCl<sub>3</sub>) for compound 4.

|                       |           |                   |                |                        |              |                      |       |
|-----------------------|-----------|-------------------|----------------|------------------------|--------------|----------------------|-------|
| Frequency (MHz)       | 250.13    | Nucleus           | <sup>1</sup> H | Number of Transients   | 16           | Origin               | spect |
| Original Points Count | 16384     | Owner             | root           | Points Count           | 32768        | Pulse Sequence       | zg30  |
| Receiver Gain         | 1149.40   | SW(cyclical) (Hz) | 5175.98        | Solvent                | CHLOROFORM-d | Spectrum Offset (Hz) |       |
| Spectrum Offset (Hz)  | 1750.4702 | Sweep Width (Hz)  | 5175.83        | Temperature (degree C) | 25.160       |                      |       |

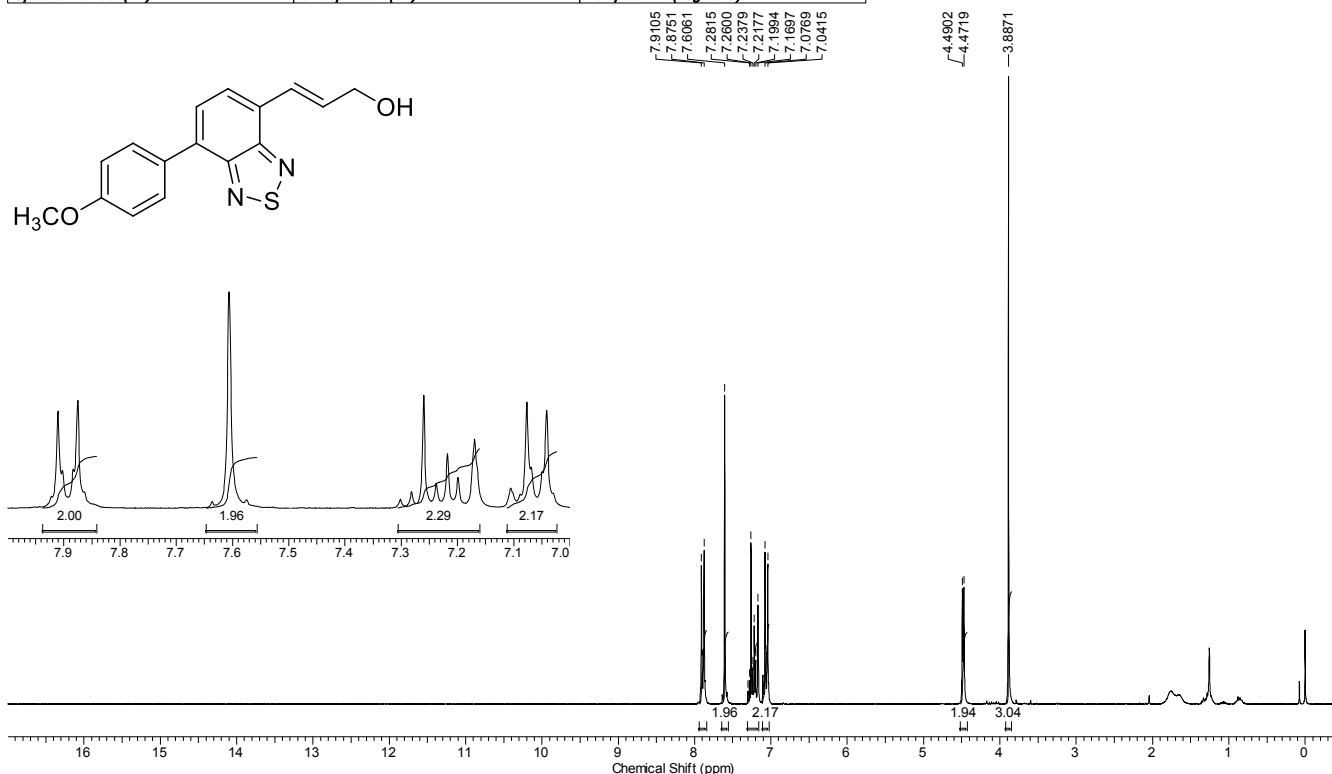

**Figure S15:** <sup>1</sup>H NMR spectrum (250 MHz, CDCl<sub>3</sub>) for (*E*)-3-(7-(4-methoxyphenyl)benzo[*c*][1,2,5]thiadiazol-4-yl)prop-2-en-1-ol.

|                       |          |                        |                 |                      |              |                      |           |
|-----------------------|----------|------------------------|-----------------|----------------------|--------------|----------------------|-----------|
| Frequency (MHz)       | 62.90    | Nucleus                | <sup>13</sup> C | Number of Transients | 1024         | Origin               | spect     |
| Original Points Count | 8192     | Owner                  | root            | Points Count         | 32768        | Pulse Sequence       | zpgg30    |
| Receiver Gain         | 287.40   | SW(cyclical) (Hz)      | 15060.24        | Solvent              | CHLOROFORM-d | Spectrum Offset (Hz) | 6288.6118 |
| Sweep Width (Hz)      | 15059.78 | Temperature (degree C) | 25.160          |                      |              |                      |           |

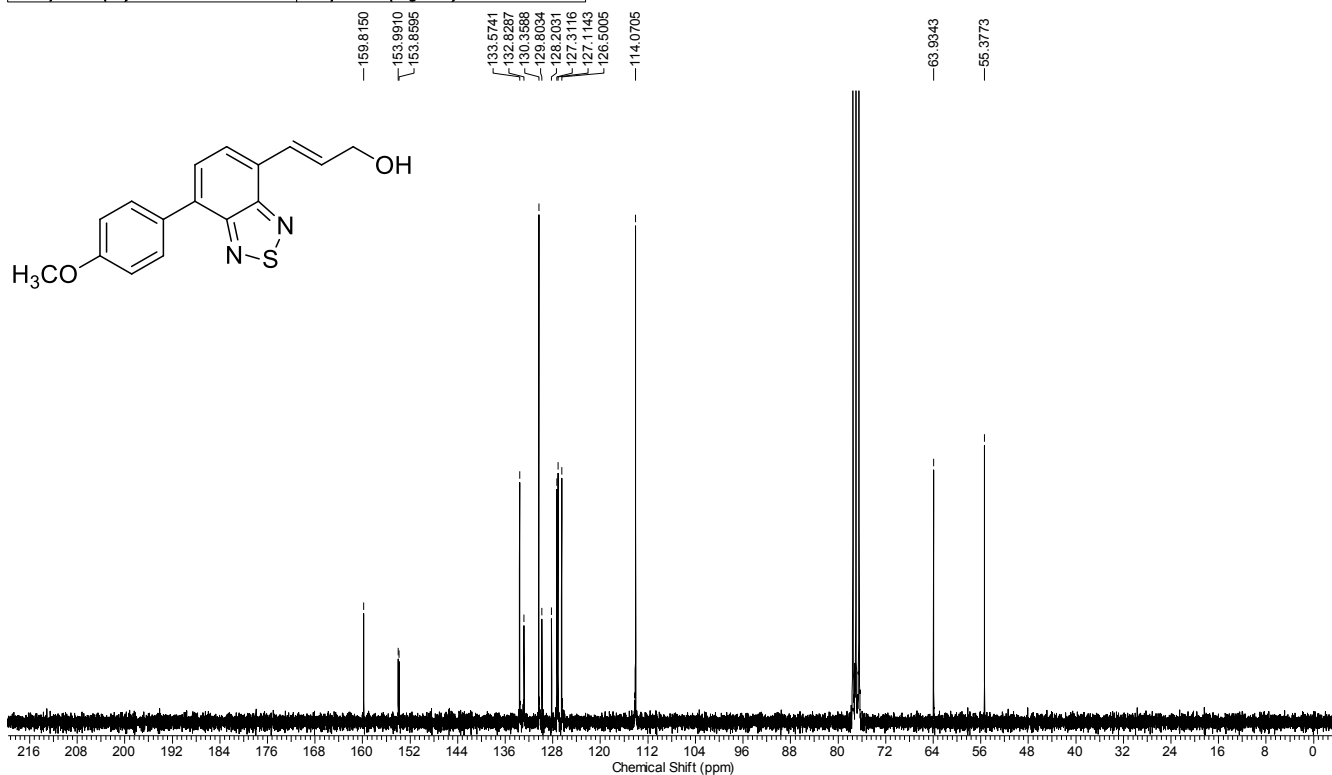

**Figure S16:** <sup>13</sup>C NMR spectrum (62,5 MHz, CDCl<sub>3</sub>) for (*E*)-3-(7-(4-methoxyphenyl)benzo[*c*][1,2,5]thiadiazol-4-yl)prop-2-en-1-ol.

|                       |           |                   |                |                        |              |                |       |
|-----------------------|-----------|-------------------|----------------|------------------------|--------------|----------------|-------|
| Frequency (MHz)       | 250.13    | Nucleus           | <sup>1</sup> H | Number of Transients   | 16           | Origin         | spect |
| Original Points Count | 16384     | Owner             | root           | Points Count           | 32768        | Pulse Sequence | zg30  |
| Receiver Gain         | 1625.50   | SW(cyclical) (Hz) | 5175.98        | Solvent                | CHLOROFORM-d |                |       |
| Spectrum Offset (Hz)  | 1750.3121 | Sweep Width (Hz)  | 5175.83        | Temperature (degree C) | 25.160       |                |       |

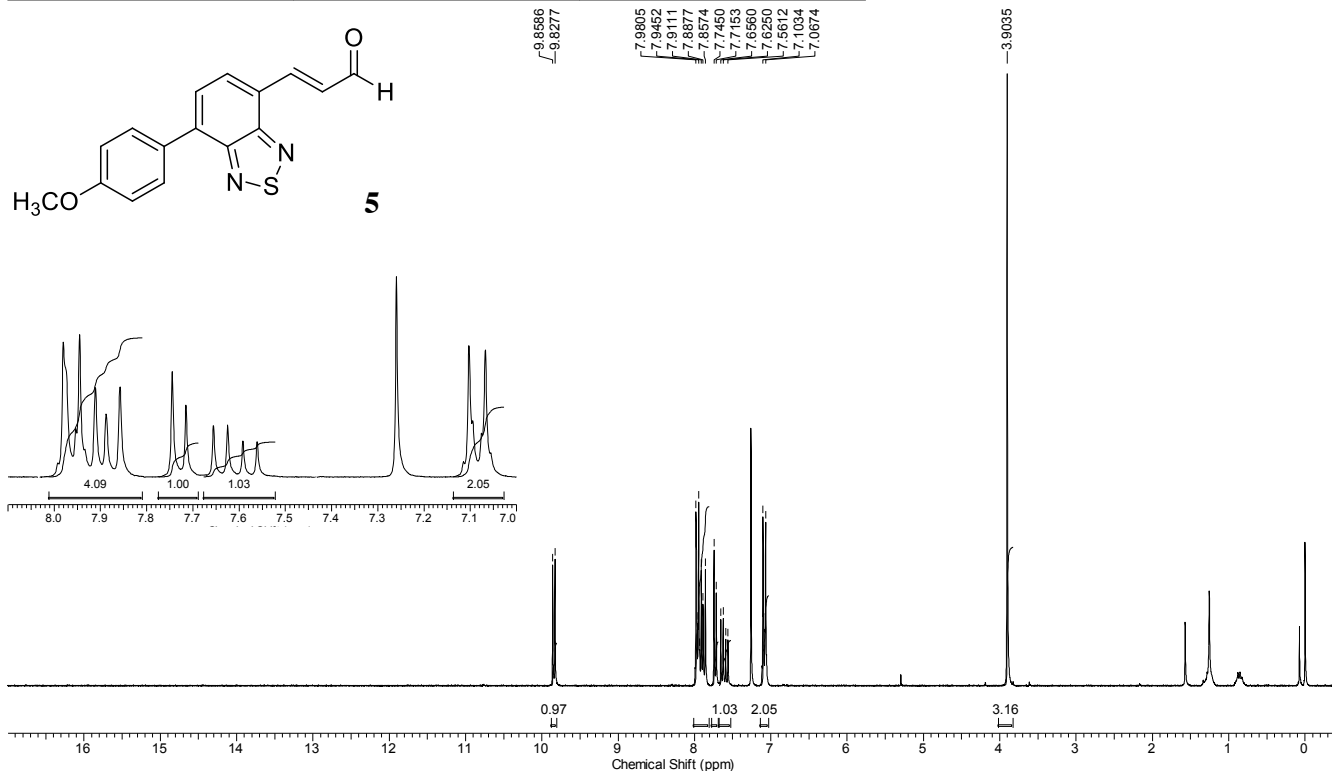

Figure S17: <sup>1</sup>H NMR spectrum (250 MHz, CDCl<sub>3</sub>) for compound 5.

|                       |          |                        |                 |                      |              |                      |           |
|-----------------------|----------|------------------------|-----------------|----------------------|--------------|----------------------|-----------|
| Frequency (MHz)       | 62.90    | Nucleus                | <sup>13</sup> C | Number of Transients | 604          | Origin               | spect     |
| Original Points Count | 8192     | Owner                  | root            | Points Count         | 32768        | Pulse Sequence       | zgpg30    |
| Receiver Gain         | 912.30   | SW(cyclical) (Hz)      | 15060.24        | Solvent              | CHLOROFORM-d | Spectrum Offset (Hz) | 6289.5313 |
| Sweep Width (Hz)      | 15059.78 | Temperature (degree C) | 25.160          |                      |              |                      |           |

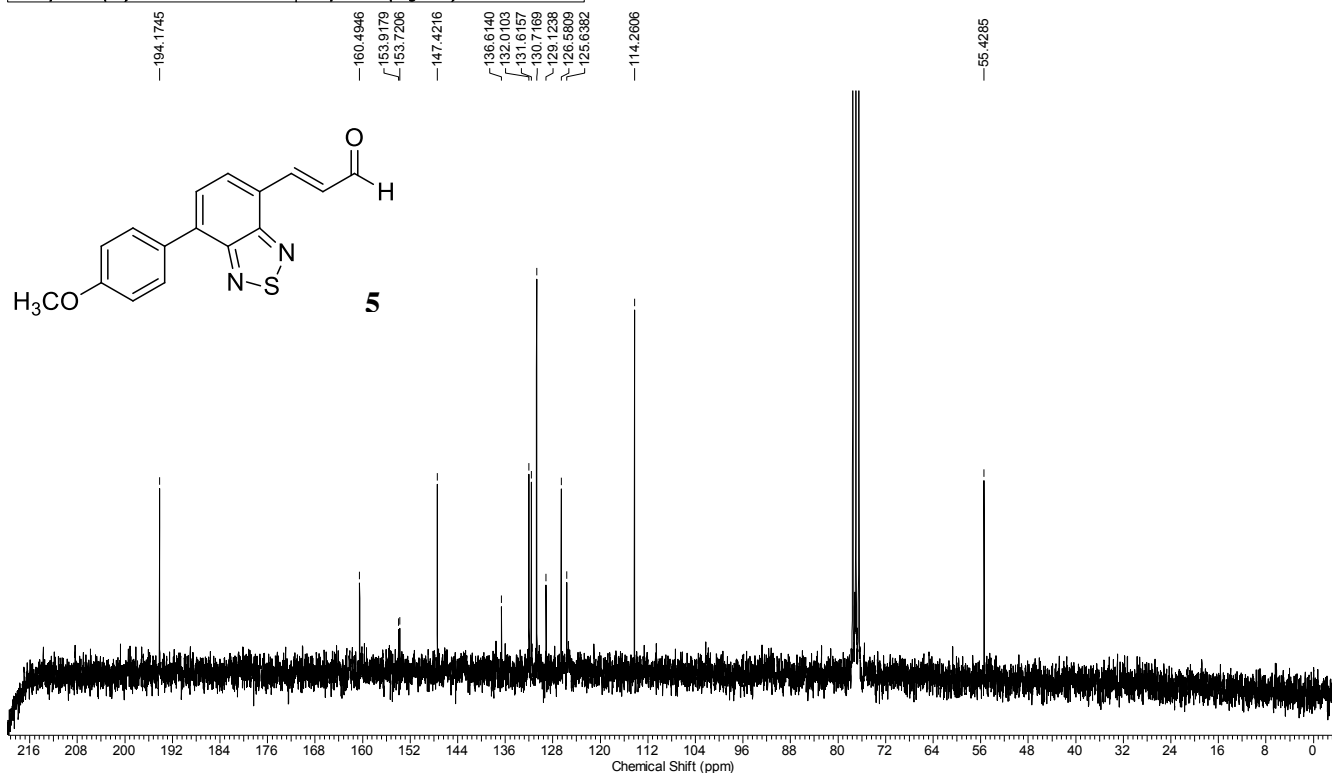

Figure S18: <sup>13</sup>C NMR spectrum (62,5 MHz, CDCl<sub>3</sub>) for compound 5.



|                       |           |                   |                |                        |              |                |       |
|-----------------------|-----------|-------------------|----------------|------------------------|--------------|----------------|-------|
| Frequency (MHz)       | 250.13    | Nucleus           | <sup>1</sup> H | Number of Transients   | 16           | Origin         | spect |
| Original Points Count | 16384     | Owner             | root           | Points Count           | 32768        | Pulse Sequence | zg30  |
| Receiver Gain         | 1149.40   | SW(cyclical) (Hz) | 5175.98        | Solvent                | CHLOROFORM-d |                |       |
| Spectrum Offset (Hz)  | 1750.4702 | Sweep Width (Hz)  | 5175.83        | Temperature (degree C) | 25.160       |                |       |

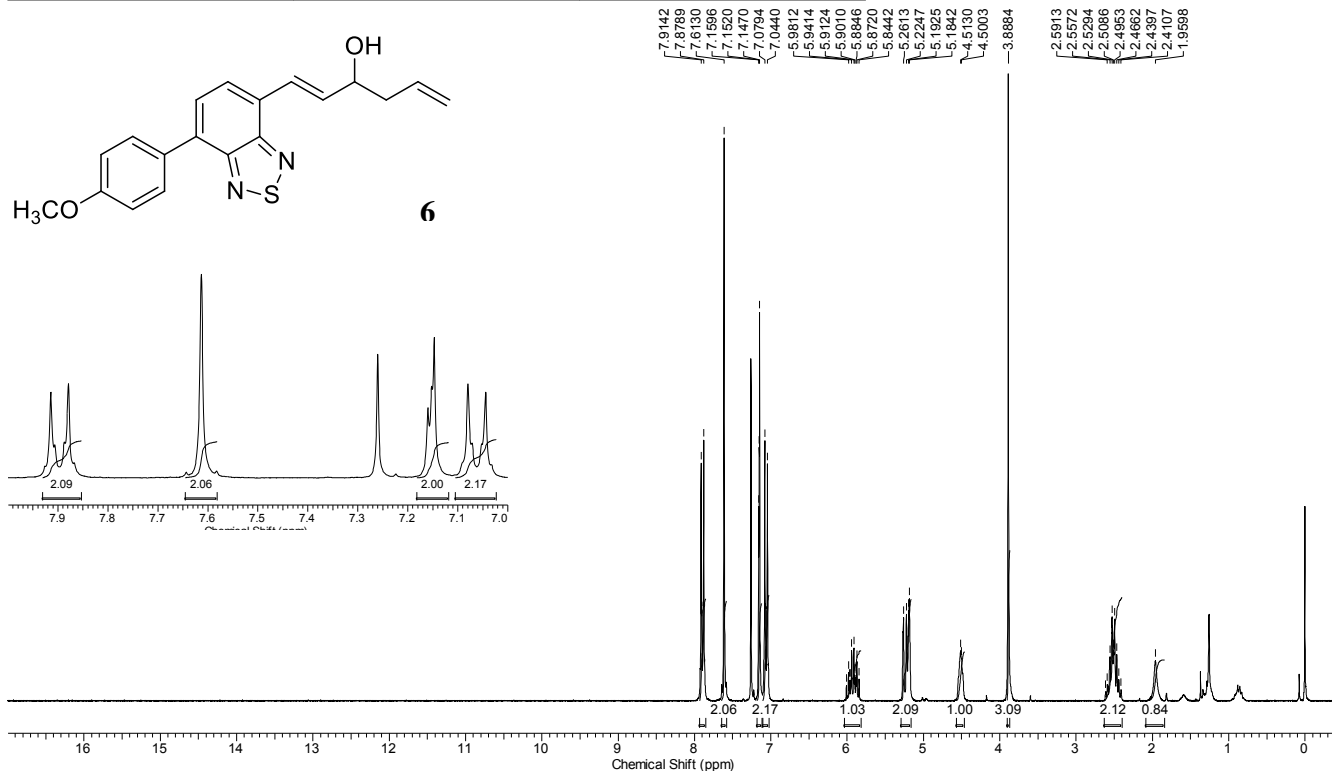

Figure S19: <sup>1</sup>H NMR spectrum (250 MHz, CDCl<sub>3</sub>) for compound 6.

|                       |          |                        |                 |                      |              |                      |           |
|-----------------------|----------|------------------------|-----------------|----------------------|--------------|----------------------|-----------|
| Frequency (MHz)       | 62.90    | Nucleus                | <sup>13</sup> C | Number of Transients | 1406         | Origin               | spect     |
| Original Points Count | 8192     | Owner                  | root            | Points Count         | 32768        | Pulse Sequence       | zgpg30    |
| Receiver Gain         | 3649.10  | SW(cyclical) (Hz)      | 15060.24        | Solvent              | CHLOROFORM-d | Spectrum Offset (Hz) | 6289.0713 |
| Sweep Width (Hz)      | 15059.78 | Temperature (degree C) | 25.160          |                      |              |                      |           |

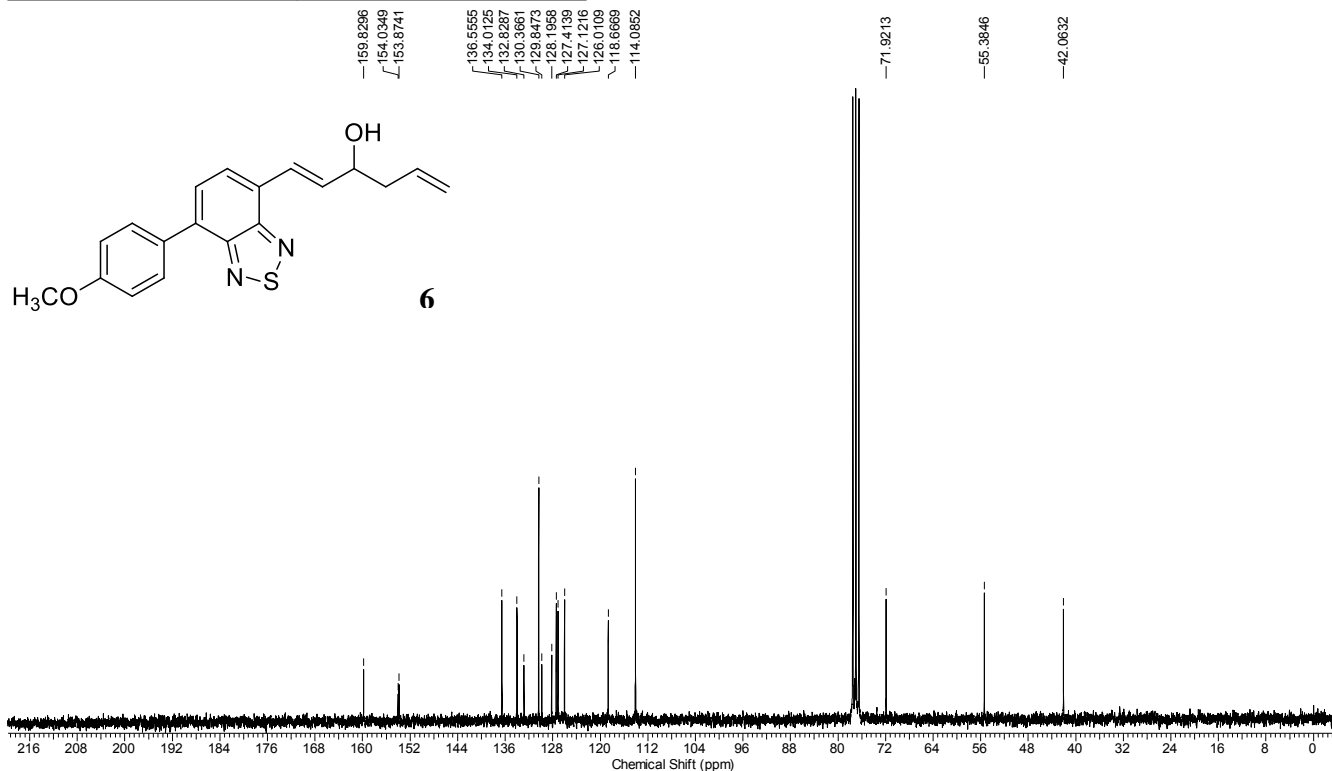

Figure S20: <sup>13</sup>C NMR spectrum (62,5 MHz, CDCl<sub>3</sub>) for compound 6.

|                       |           |                   |                |                        |              |                |       |
|-----------------------|-----------|-------------------|----------------|------------------------|--------------|----------------|-------|
| Frequency (MHz)       | 250.13    | Nucleus           | <sup>1</sup> H | Number of Transients   | 16           | Origin         | spect |
| Original Points Count | 16384     | Owner             | root           | Points Count           | 32768        | Pulse Sequence | zg30  |
| Receiver Gain         | 1149.40   | SW(cyclical) (Hz) | 5175.98        | Solvent                | CHLOROFORM-d |                |       |
| Spectrum Offset (Hz)  | 1750.3121 | Sweep Width (Hz)  | 5175.83        | Temperature (degree C) | 25.160       |                |       |

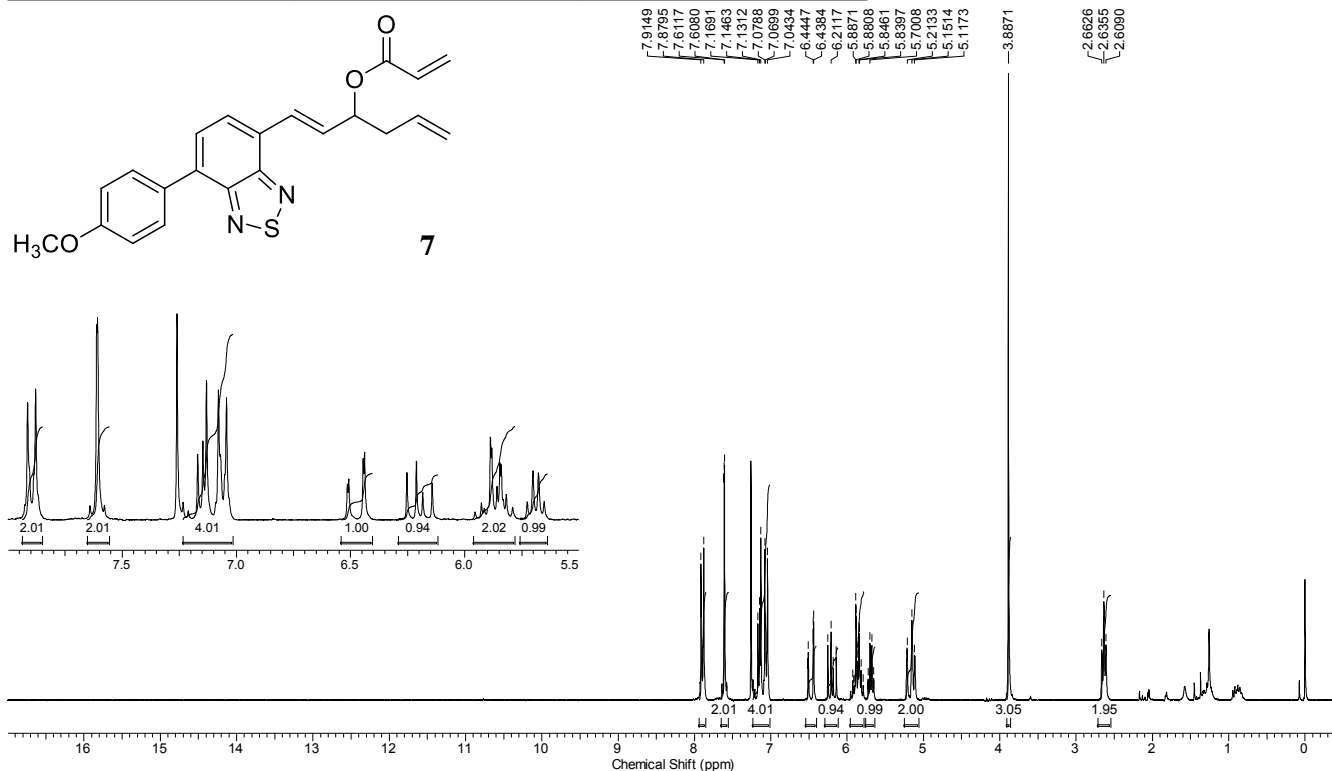

Figure S21: <sup>1</sup>H NMR spectrum (250 MHz, CDCl<sub>3</sub>) for compound 7.

|                       |          |                        |                 |                      |              |                      |           |
|-----------------------|----------|------------------------|-----------------|----------------------|--------------|----------------------|-----------|
| Frequency (MHz)       | 62.90    | Nucleus                | <sup>13</sup> C | Number of Transients | 1024         | Origin               | spect     |
| Original Points Count | 8192     | Owner                  | root            | Points Count         | 32768        | Pulse Sequence       | zgpg30    |
| Receiver Gain         | 406.40   | SW(cyclical) (Hz)      | 15060.24        | Solvent              | CHLOROFORM-d | Spectrum Offset (Hz) | 6289.0713 |
| Sweep Width (Hz)      | 15059.78 | Temperature (degree C) | 25.160          |                      |              |                      |           |

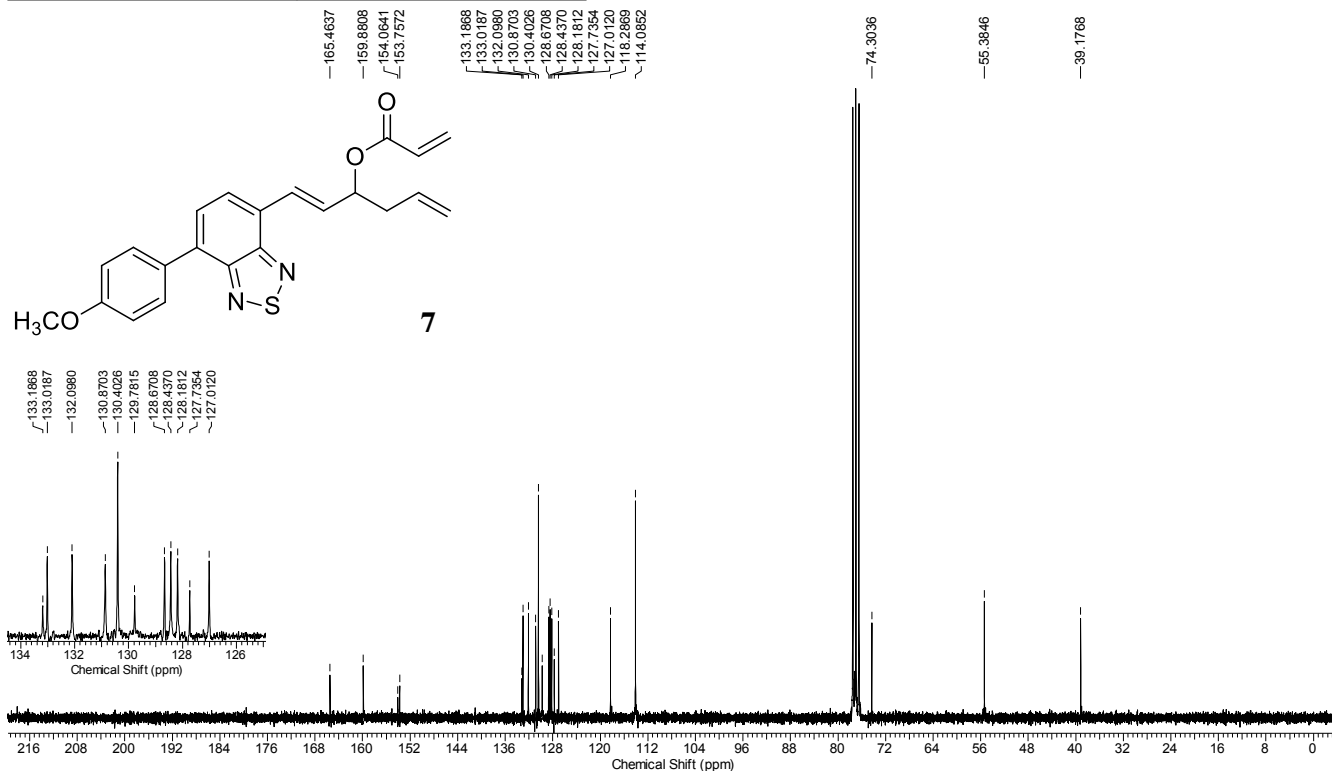

Figure S22: <sup>13</sup>C NMR spectrum (62,5 MHz, CDCl<sub>3</sub>) for compound 7.

|                       |         |                        |                |                      |              |                      |           |
|-----------------------|---------|------------------------|----------------|----------------------|--------------|----------------------|-----------|
| Frequency (MHz)       | 499.87  | Nucleus                | <sup>1</sup> H | Number of Transients | 16           | Origin               | spect     |
| Original Points Count | 16384   | Owner                  | nmrsu          | Points Count         | 65536        | Pulse Sequence       | zg30      |
| Receiver Gain         | 144.00  | SW(cyclical) (Hz)      | 10000.00       | Solvent              | CHLOROFORM-d | Spectrum Offset (Hz) | 3069.4399 |
| Sweep Width (Hz)      | 9999.85 | Temperature (degree C) | 20.152         |                      |              |                      |           |

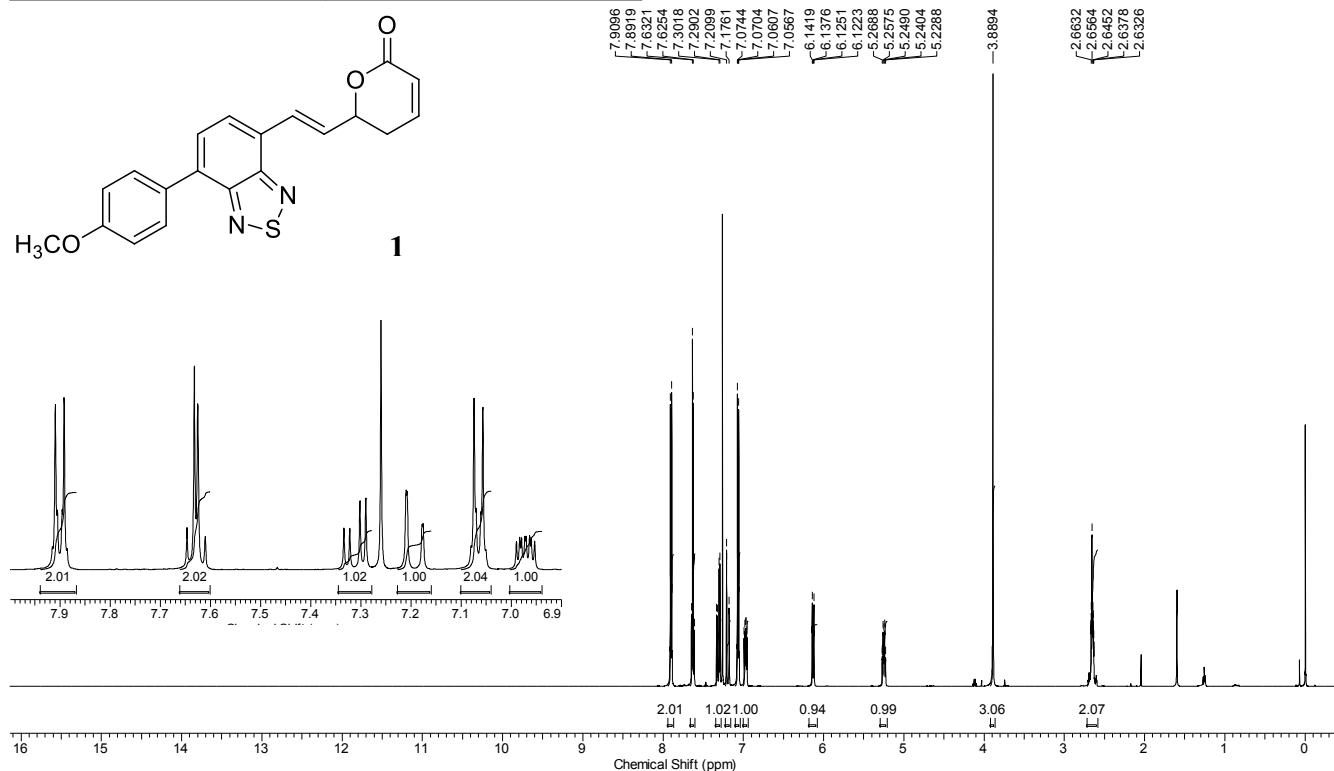

Figure S23: <sup>1</sup>H NMR spectrum (500 MHz, CDCl<sub>3</sub>) for compound 1.

|                       |          |                        |                 |                      |              |                      |            |
|-----------------------|----------|------------------------|-----------------|----------------------|--------------|----------------------|------------|
| Frequency (MHz)       | 125.69   | Nucleus                | <sup>13</sup> C | Number of Transients | 512          | Origin               | spect      |
| Original Points Count | 16384    | Owner                  | nmrsu           | Points Count         | 32768        | Pulse Sequence       | zgpg30     |
| Receiver Gain         | 2050.00  | SW(cyclical) (Hz)      | 29761.90        | Solvent              | CHLOROFORM-d | Spectrum Offset (Hz) | 12560.6836 |
| Sweep Width (Hz)      | 29761.00 | Temperature (degree C) | 20.151          |                      |              |                      |            |

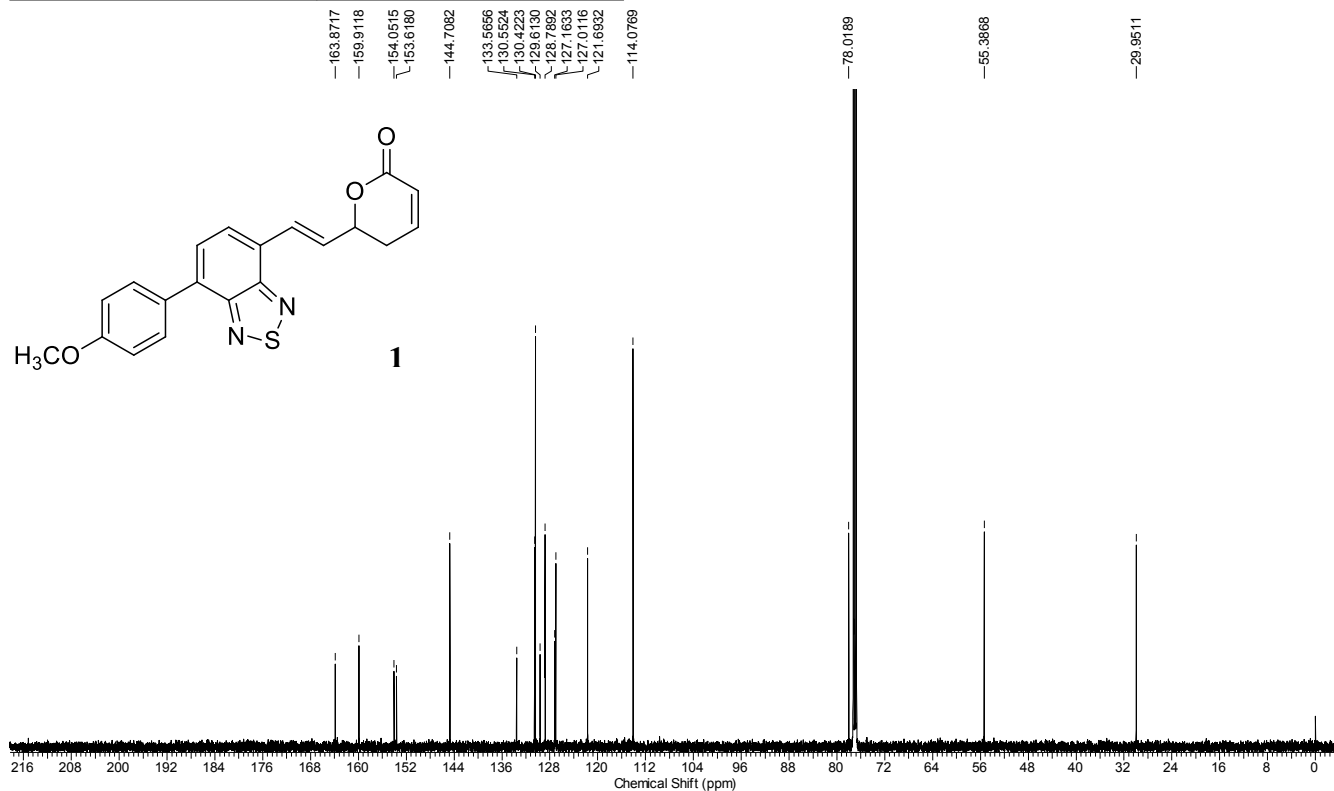

Figure S24: <sup>13</sup>C NMR spectrum (125 MHz, CDCl<sub>3</sub>) for compound 1.

This material is available free of charge via internet at <http://pubs.acs.org>
